# Supplementary material for: Genome Sequencing of Historical Encephalomyocarditis Viruses from South Africa Links the Historical 1993/4 Savanna Elephant (Loxodonta africana) Outbreak to Cryptic Mastomys Rodents
Source: MDPI journal article supplement (doi:10.3390/pathogens13030261), 2024-03-19
Supplement: s1 [file s1]

**Table S1.** Primer pairs used to amplify and sequence overlapping coding and non-coding genome regions for five historical encephalomyocarditis viruses from South Africa inclusive of two elephants (SPU17/94 and SPU19/94), one *Laelaps* mite (AR3959/61) and two *Mastomys* (AN7402/61 and AN7405/61) strains.

| Primer set and orientation (F: Forward/R: Reverse) | Reference                        | Primer binding site* | Historical virus strains amplified                | Expected amplicon size | Targeted genome region | Touch down PCR annealing temperatures and the number of cycles |
|----------------------------------------------------|----------------------------------|----------------------|---------------------------------------------------|------------------------|------------------------|----------------------------------------------------------------|
| EMC-AB1: GGCCGAAGCCGCTTGGAATA (F)                  | van Sandwyk <i>et al.</i> (2013) | 219-238              | SPU17/94;<br>SPU19/94                             | 285                    | 5'UTR                  | 59°C (2x), 57°C (3x),<br>55°C (35x)                            |
| EMC-AB2: ACGTGGCTTTTGGCCGCAGA (R)                  | van Sandwyk <i>et al.</i> (2013) | 484-503              |                                                   |                        |                        |                                                                |
| EMC-AB1: GGCCGAAGCCGCTTGGAATA (F)                  | van Sandwyk <i>et al.</i> (2013) | 219-238              | All                                               | 1037                   | 5'UTR-1B               | 61°C (2x), 59°C (3x),<br>57°C (35x)                            |
| 1356R-AB: TGGGTGTTTGACCGTGTT (R)                   | van Sandwyk <i>et al.</i> (2013) | 1232-1251            |                                                   |                        |                        |                                                                |
| 687F-AB: GCTCTCCTCAAGCGTATTCA (F)                  | van Sandwyk <i>et al.</i> (2013) | 581-600              | SPU17/94;<br>SPU19/94                             | 1886                   | 5'UTR-1B               | 50°C (2x), 48°C (3x),<br>46°C (35x)                            |
| 1356R-AB: TGGGTGTTTGACCGTGTT (R)                   | van Sandwyk <i>et al.</i> (2013) | 1232-1251            |                                                   |                        |                        |                                                                |
| 687F-AB: GCTCTCCTCAAGCGTATTCA (F)                  | van Sandwyk <i>et al.</i> (2013) | 581-600              | All                                               | 1886                   | 5'UTR-1C               | 57°C (2x), 55°C (3x),<br>53°C (35x)                            |
| 2113R-AB: CAGTCCCCACCATGCGGAAGTG (R)               | van Sandwyk <i>et al.</i> (2013) | 2444-2465            |                                                   |                        |                        |                                                                |
| VP4-F1: CGCCGATCAAGATACGGAGGA (F)                  | This study                       | 926-946              | AN7402/61                                         | 3166                   | L-2B                   | 60°C (2x), 58°C (3x),<br>56°C (35x)                            |
| 2B-RM: CGGCAGTAGGGTTTGAGCCATT (R)                  | van Sandwyk <i>et al.</i> (2013) | 4070-4091            |                                                   |                        |                        |                                                                |
| 1307F-AB: TCAGACCGAGTGTCTCAAGA (F)                 | van Sandwyk <i>et al.</i> (2013) | 1202-1221            | All                                               | 1264                   | 1B-1C                  | 59°C (2x), 57°C (3x),<br>55°C (35x)                            |
| 2113R-AB: CAGTCCCCACCATGCGGAAGTG (R)               | van Sandwyk <i>et al.</i> (2013) | 2444-2465            |                                                   |                        |                        |                                                                |
| 1307F-AB: TCAGACCGAGTGTCTCAAGA (F)                 | van Sandwyk <i>et al.</i> (2013) | 1317-1336            | AR3595/61;<br>AN7402/61;<br>AN7405/61             | 414                    | 1B                     | 55°C (2x), 53°C (3x),<br>51°C (35x)                            |
| 1720R-AB: CTTGGACCATCTGTTGTCCAT (R)                | van Sandwyk <i>et al.</i> (2013) | 1710-1730            |                                                   |                        |                        |                                                                |
| 1904F-AB: GCTTCCTGGACTTTGGTGAT (F)                 | van Sandwyk <i>et al.</i> (2013) | 1914-1933            | AR3595/61;<br>AN7402/61;<br>AN7405/61             | 2178                   | 1B-2B                  | 56°C (2x), 54°C (3x),<br>52°C (35x)                            |
| 2B-RM: CGGCAGTAGGGTTTGAGCCATT (R)                  | van Sandwyk <i>et al.</i> (2013) | 4070-4091            |                                                   |                        |                        |                                                                |
| 2246MF-JvS: GTACCGTGATCACTAGTCTA (F)               | van Sandwyk <i>et al.</i> (2013) | 2248-2268            | SPU17/94;<br>SPU19/94                             | 985                    | 1C-1D                  | 58°C (2x), 57°C (3x),<br>56°C (35x)                            |
| 3204MR-JvS: GACAGCAGGTAGGACAGACAA (R)              | van Sandwyk <i>et al.</i> (2013) | 3212-3232            |                                                   |                        |                        |                                                                |
| 2246MF-JvS: GTACCGTGATCACTAGTCTA (F)               | van Sandwyk <i>et al.</i> (2013) | 2248-2268            | SPU19/94                                          | 1729                   | 1C-2B                  | 56°C (2x), 54°C (3x),<br>52°C (35x)                            |
| 2B-RM: CGGCAGTAGGGTTTGAGCCATT (R)                  | van Sandwyk <i>et al.</i> (2013) | 3954-3976            |                                                   |                        |                        |                                                                |
| VP3-FM: CACTTCCGCATGGTGGGAACTG (F)                 | van Sandwyk <i>et al.</i> (2013) | 2444-2465            | SPU17/94;<br>SPU19/94;<br>AR3595/61;<br>AN7402/61 | 1533                   | 1C-2B                  | 57°C (2x), 55°C (3x),<br>53°C (35x)                            |
| 2B-RM: CGGCAGTAGGGTTTGAGCCATT (R)                  | van Sandwyk <i>et al.</i> (2013) | 3954-3976            |                                                   |                        |                        |                                                                |

|                                         |                                  |           |                          |      |        |                                     |
|-----------------------------------------|----------------------------------|-----------|--------------------------|------|--------|-------------------------------------|
| VP3-FM: CACTTCCGCATGGTGGGAACTG (F)      | van Sandwyk <i>et al.</i> (2013) | 2444-2465 | SPU17/94                 | 1597 | 1C-2A  | 64°C (2x), 62°C (3x),<br>60°C (35x) |
| EMC2C-IR: CGTCCTCGTTGGCATCGAGCAA (R)    | This study                       | 4019-4040 |                          |      |        |                                     |
| EMC2B-F4: CCACAAGGGATTGGAGGTTAGA (F)    | This study                       | 3526-3547 | SPU19/94                 | 515  | 2A-2B  | 60°C (2x), 58°C (3x),<br>56°C (35x) |
| EMC2C-IR: CGTCCTCGTTGGCATCGAGCAA (R)    | This study                       | 4019-4040 |                          |      |        |                                     |
| EMC-2BF2: GGTCAGTTGTGGGCTGAAACA (F)     | This study                       | 3744-3764 | SPU19/94                 | 297  | 2A-2B  | 61°C (2x), 59°C (3x),<br>57°C (35x) |
| EMC2C-IR: CGTCCTCGTTGGCATCGAGCAA (R)    | This study                       | 4019-4040 |                          |      |        |                                     |
| EMC-2BF2: GGTCAGTTGTGGGCTGAAACA (F)     | This study                       | 3744-3764 | SPU17/94                 | 2089 | 2A-3AB | 60°C (2x), 58°C (3x),<br>56°C (35x) |
| EMC3C-IR: GTGTGACTAACACCACGCACTAC (R)   | This study                       | 5810-5832 |                          |      |        |                                     |
| EMC-2BF3: GCAGGATATTTCACGGATCTC (F)     | This study                       | 4026-4046 | AR3595/61;<br>AN7402/61; | 2843 | 2B-3D  | 60°C (2x), 58°C (3x),<br>56°C (35x) |
| EMC-3DR3: CCAATCTCTCTGCTGCATAT (R)      | This study                       | 6848-6868 | AN7405/61                |      |        |                                     |
| 4049-JvSF: GGAGCGGCAGTGTCAAT (F)        | This study                       | 4053-4072 | SPU17/94;                | 1780 | 2B-3AB | 59°C (2x), 57°C (3x),<br>55°C (35x) |
| EMC3C-IR: GTGTGACTAACACCACGCACTAC (R)   | This study                       | 5810-5832 | SPU19/94                 |      |        |                                     |
| 4518-FAB: CGGAATGGAATGGCTGCCTATGT (F)   | This study                       | 4641-4663 | SPU17/94;                | 1192 | 2C-3C  | 62°C (2x), 60°C (3x),<br>58°C (35x) |
| EMC3C-IR: GTGTGACTAACACCACGCACTAC (R)   | This study                       | 5810-5832 | SPU19/94                 |      |        |                                     |
| EMC2C-IF: GCGCCAGTCAGTATATTCTCTTC (F)   | This study                       | 4770-4792 | SPU17/94;                | 1063 | 2B-3AB | 61°C (2x), 59°C (3x),<br>57°C (35x) |
| EMC3C-IR: GTGTGACTAACACCACGCACTAC (R)   | This study                       | 5810-5832 | SPU19/94                 |      |        |                                     |
| EMC-3CF1-VvM: GCCCTATTGATTTTGTGTAT (F)  | This study                       | 5696-5716 | SPU17/94;                | 1286 | 3C-3D  | 54°C (2x), 52°C (3x),<br>50°C (35x) |
| EMC-3D2R: CCGGTTGGGTCTGGAAC TT (R)      | This study                       | 6963-6981 | SPU19/94                 |      |        |                                     |
| EMC-3CF2-VvM: GCCGCGTCAATAATTTACAAA (F) | This study                       | 6202-6222 | SPU17/94;                | 780  | 3C-3D  | 58°C (2x), 56°C (3x),<br>54°C (35x) |
| EMC-3D2R: CCGGTTGGGTCTGGAAC TT (R)      | This study                       | 6963-6981 | SPU19/94                 |      |        |                                     |
| 6453F-VVM: CCCTCCAGTGT TAGAATGGTT (F)   | This study                       | 6451-6472 | SPU19/94                 | 1343 | 3D     | 58°C (2x), 56°C (3x),<br>54°C (35x) |
| EMC-3DRAB: CTTACCGGTAACGCGTTGT (R)      | van Sandwyk <i>et al.</i> (2013) | 7774-7793 |                          |      |        |                                     |
| 6793F-VvM: CCCACCATTTGAGCATTGCAT (F)    | This study                       | 6793-6813 | SPU17/94;                | 464  | 3D     | 58°C (2x), 56°C (3x),<br>54°C (35x) |
| 7256R-VvM: CGCCATAAGACAAGATCTTCACAT (R) | This study                       | 7233-7256 | SPU19/94                 |      |        |                                     |

\*Primer binding sites correspond to reference sequence L22089 (Mengo isolate M *Macaca mulatta* Uganda 1946).

**Table S2:** Internal primers, designed during the course of this study, to generate overlapping genome region sequences for both strands of each amplicon for three historical rodent-associated EMC viruses in South Africa.

| Primer name and Orientation (F: Forward/R: Reverse) | Primer binding site* | Amplified virus strains         |
|-----------------------------------------------------|----------------------|---------------------------------|
| 1D-R2: 5' - GGCAAATCCTGACTCCAAACTC - 3' (R)         | 2590-2611            | AN7402/61                       |
| EMC-AB2: 5' - ACGTGGCTTTTGGCCGCAGA - 3' (R)         | 598-617              | AR3595/61; AN7402/61; AN7405/61 |
| EMC2C-IR: 5' - CGTCCTCGTTGGCATCGAGCAA - 3' (R)      | 4019-4040            | AR3595/61; AN7402/61; AN7405/61 |
| EMC3C-IR: 5' - GTGTGACTAACACCACGCACTAC - 3' (R)     | 5810-5832            | AR3595/61; AN7402/61; AN7405/61 |
| EMC2C-IF: 5' - GCGCCAGTCAGTATATTCTCTTC - 3' (F)     | 4770-4792            | AR3595/61; AN7402/61; AN7405/61 |

\*Primer binding site determined using the reference sequence L22089 (Mengo isolate M *Macaca mulatta* Uganda 1946).

**Table S3.** Summary statistics for the three EMCV-1 datasets (i-iii) used for phylogenetic inference in this study.

| Dataset                  | No. taxa | Length (bases) | Va sites | Pi sites | Average nucleotide composition (%): empirical/uncorrected |      |      |      | R    | Best-fit model of sequence evolution (under BIC) |
|--------------------------|----------|----------------|----------|----------|-----------------------------------------------------------|------|------|------|------|--------------------------------------------------|
|                          |          |                |          |          | T                                                         | C    | A    | G    |      |                                                  |
| (i) Near-complete genome | 41       | 7418           | 3511     | 3189     | 25.7                                                      | 24.3 | 26.4 | 23.6 | 1.57 | GTR+G+I (G=0.67, I=0.39)                         |
| (ii) VP3/1 gene          | 52       | 1539           | 778      | 729      | 27.1                                                      | 27.1 | 24.2 | 21.6 | 1.42 | TN93+G+I (G=0.91, I=0.44)                        |
| (iii) 3D gene            | 63       | 242            | 105      | 94       | 27.2                                                      | 24.7 | 27.7 | 20.4 | 2.3  | K2P+G (G=0.24)                                   |

BIC: Bayesian information criterion; No.: Number; V: variable; Pi: parsimony-informative; R: transition: transversion ratio (R). GTR: General Time Reversible; TN93: Tamura-Nei; K2P: Kimura 2-parameter; G: Gamma distribution; I: proportion of invariant sites.

**Table S4.** Matrix showing the pairwise nucleotide sequence identity (%) between five historical encephalomyocarditis viruses from South Africa inclusive of two elephant (SPU17/94 and SPU19/94), one *Laelaps* mite (AR3959/61) and two *Mastomys* (AN7402/61 and AN7405/61) strains.

|           | SPU19/94 | SPU17/94 | AR3595/61 | AN7402/61 | AN7405/61 |
|-----------|----------|----------|-----------|-----------|-----------|
| SPU19/94  |          |          |           |           |           |
| SPU17/94  | 99.8513  |          |           |           |           |
| AR3595/61 | 93.6334  | 93.6469  |           |           |           |
| AN7402/61 | 93.5929  | 93.6064  | 99.9459   |           |           |
| AN7405/61 | 93.6064  | 93.6199  | 99.9730   | 99.9459   |           |
